# Supplementary material
Source: publisher figshare collection journal article supplement (https://gsapubs.figshare.com/ndownloader/files/23198087)

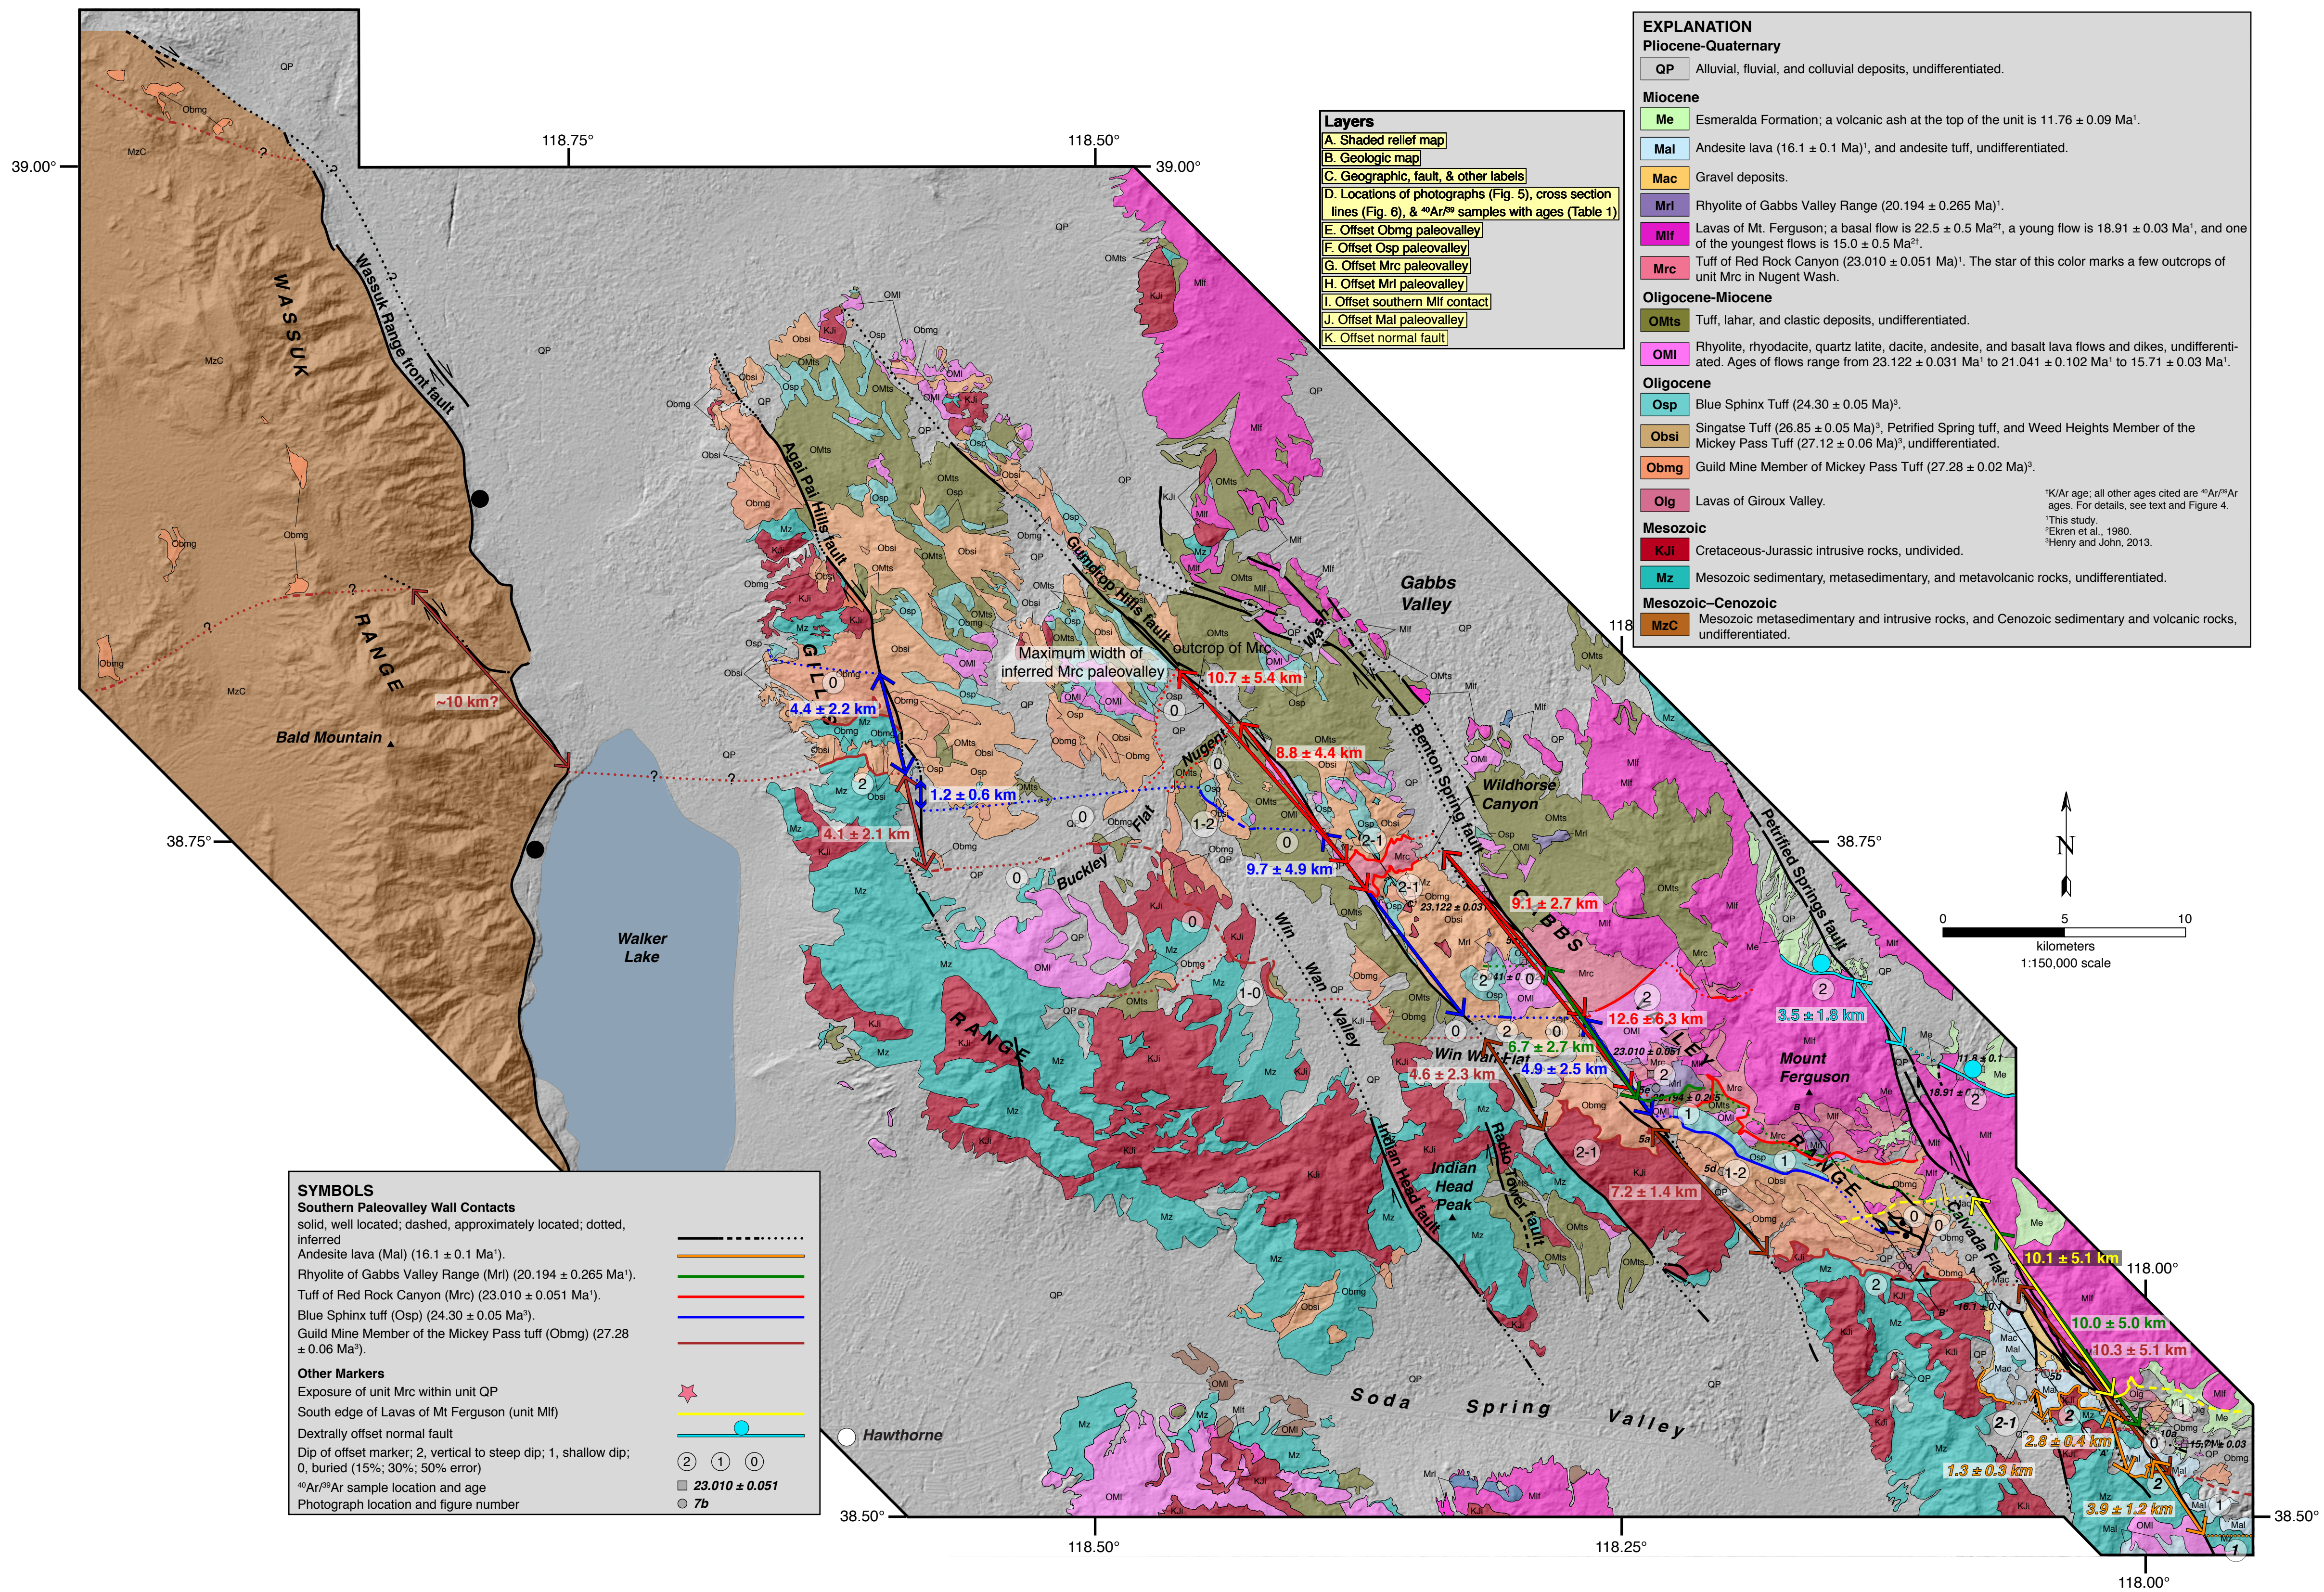

Supplement: Supplementary file 1 [file 23198087]
